# Supplementary material
Source: HighWire-hosted journal article supplement (https://bmjopen.bmj.com/content/14/11/e085160)
Supplement: inline-supplementary-material-1 [file inline-supplementary-material-1.pdf]

## Supplemental file 1. Interview guide

### Question 1: About you and the ACT team

(i) *What is your position in your team?*

► Team leader ► Team doctor ► Cooperating doctor ► Other (please specify)

(ii) *What is your job title?*

► Doctor ► Nurse ► Occupational therapist ► Case worker ► Other (please specify)

(iii) *What qualifications do you have?*

► Medical doctor ► Public health nurse ► Nurse practitioner ► Mental health social worker ► clinical psychologist ► Occupational therapist ► Other specialist, ► Peer staff, ► Other (please specify)

(iv) *How many years of experience do you have in your occupation?* ( ) years

(v) *How many years of experience do you have in the team?* ( ) years

(vi) *Are fidelity audits carried out?* ► Yes ► No (please specify reason)

### Question 2: Initiatives in this local area by team (introductory question)

*Please tell us about any issues associated with psychiatric care, health, or welfare in this local area.*

*-What do you think are the causes or background of these issues?*  
(probing questions)

*What is the ACT team's approach to this issue?*

*-Priority issues, efforts to address them, other measures, etc.*  
(probing questions)

*We will ask a little more about issues regarding initiatives.*

*-Who decided on and introduced the ACT team and by what process?*  
*-Also, how did the implementation go?*  
(probing questions)

*What were the deciding factors for implementing ACT for the issue?*

- What information was important to you and to the founders in the implementation process? What information were you looking for?
  - Advantages and disadvantages compared with other measures
  - Cost of implementation-Availability of procedures, tools, resources, etc. for implementation
- (probing questions)

**Question 3: Factors that inhibit or facilitate the implementation of ACT (focus question)**

***What do you think is the most important things for your team in implementing the ACT?***

- What do you think is the most important thing required or that will promote or have a positive impact on the implementation of ACT?
  - What do you think is the most important point regarding the above?
  - Please tell us about any innovations that have been effective in promoting the ACT team.
  - What do you think is impeding or negatively affecting implementation
  - What do you think will have the greatest impact on your team's implementation?
- (probing questions)

**Question 4: Outer setting (focusing on constructs not responded to in question 3)**

***We would like to continue to ask you about things that you think have influenced your team to implement ACT.***

***Are there any other things or objects outside your team that you would like to mention?***

- For example, how did you feel about the following factors?
- The existence of other institutions implementing similar programmes (e.g., health centres, in-home nursing, consultation support offices, etc.)
- Availability of evaluation and accreditation by national, prefectural, and associated bodies (e.g., medical fees, fidelity)
- The impact of laws and guidelines

*-The extent to which staffs interact with people and organisations outside the team, or participate in meetings, events, etc. e.g., council for independence and support (probing questions)*

**Question 5: Inner setting (focusing on constructs not answered in question 3)**

*Are there anything of note within the team?*

- For example, how did you feel about the following factors*
  - The degree of daily communication within the team and within the legal entity*
  - The degree to which the needs of staffs match the content of the ACT*
  - The priority of the ACT within the legal entity*
  - The level of involvement of managers, administrators, etc.*
  - Corporate culture*
  - Resources the legal entity or team currently have.*
- (probing questions)*

**Question 6: Implementation process (focus on components not answered in question 3)**

*How was your team's process for setting goals, formatting specific plans, and conducting evaluations for implementation ACT?*

.

*Please tell us about the existence of internal and external stakeholders who have an influence on both inside and outside of the organisation that influence on the implementation of ACT in your organization?*

**Question 7: Summary (summary question)**

*What do you think should be done by the government, prefecture, or administrative agencies should do to further promote the implementation of ACT in your team?*

- What do you think the government, prefecture, or administrative agencies should provide you to further promote the implementation of ACT?*
  - What kind of plan does your organisation have in the future?*
- (probing questions)*

*As we are running out of time, we would like to summarise today's interview.  
The following were mentioned as important things to promote ( or inhibit) ACT,  
especially \_\_\_\_\_.*

*Among them, \_\_\_\_\_ was said to be important.*

*We also received comments on \_\_\_\_\_.*

*Do you have any comments on these summaries?*

*Question 8: Lastly, do you have any other comments you would like to make?*

*Thank you for your time and cooperation.*
